# Supplementary material for: The STING Ligand and Delivery System Synergistically Enhance the Immunogenicity of an Intranasal Spike SARS-CoV-2 Vaccine Candidate
Source: MDPI journal article supplement (doi:10.3390/biomedicines10051142), 2022-05-16
Supplement: s1 [file s1]

## Supplementary Figure S1

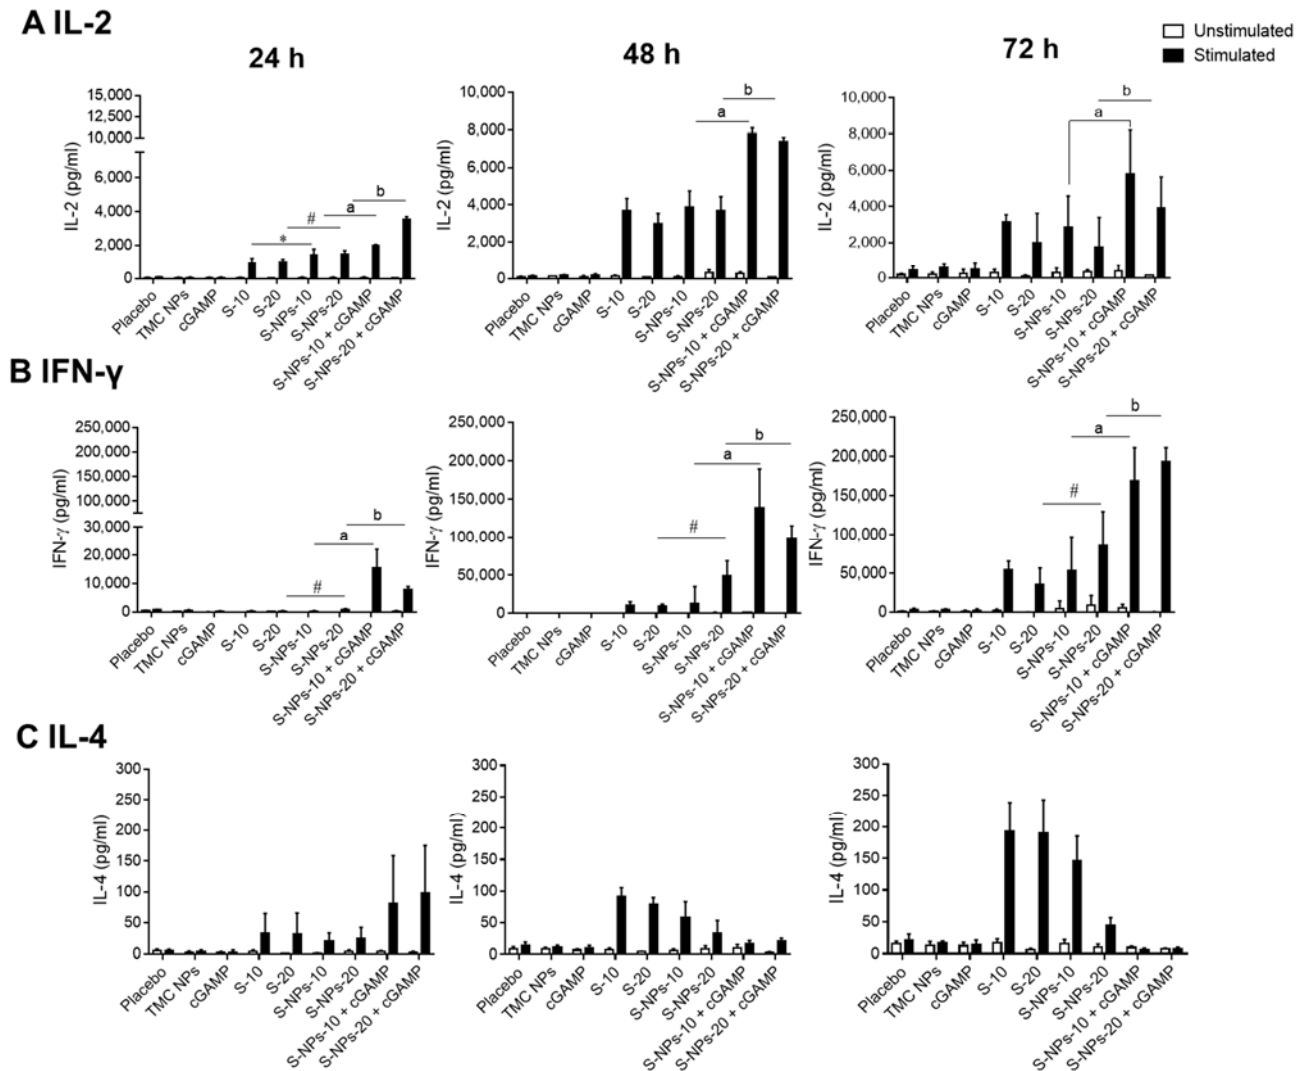

**Figure S1 Splenic cytokine profiles.** The splenocytes of immunized mice on day 45 were isolated and stimulated with S-protein (10  $\mu\text{g}/\text{mL}$ ). Culture supernatants were harvested for three consecutive days (24, 48, and 72 h of treatment). The levels of splenic cytokines including IL-2, IFN- $\gamma$ , and IL-4 were monitored by ELISAs. Data are shown as mean  $\pm$  SD ( $n = 4-5$ ). \* and # indicate significant differences between soluble S-protein and S-NPs at 10 and 20  $\mu\text{g}/\text{dose}$ , respectively. “a” and “b” indicate significant differences of S-NPs compared with S-NPs + cGAMP at 10 and 20  $\mu\text{g}/\text{dose}$ , respectively ( $p < 0.05$ ).
